# Supplementary material
Source: PubMed Central journal article supplement (PMC3067917)

CYTOKINE-CYTOKINE RECEPTOR INTERACTION

Chemokines

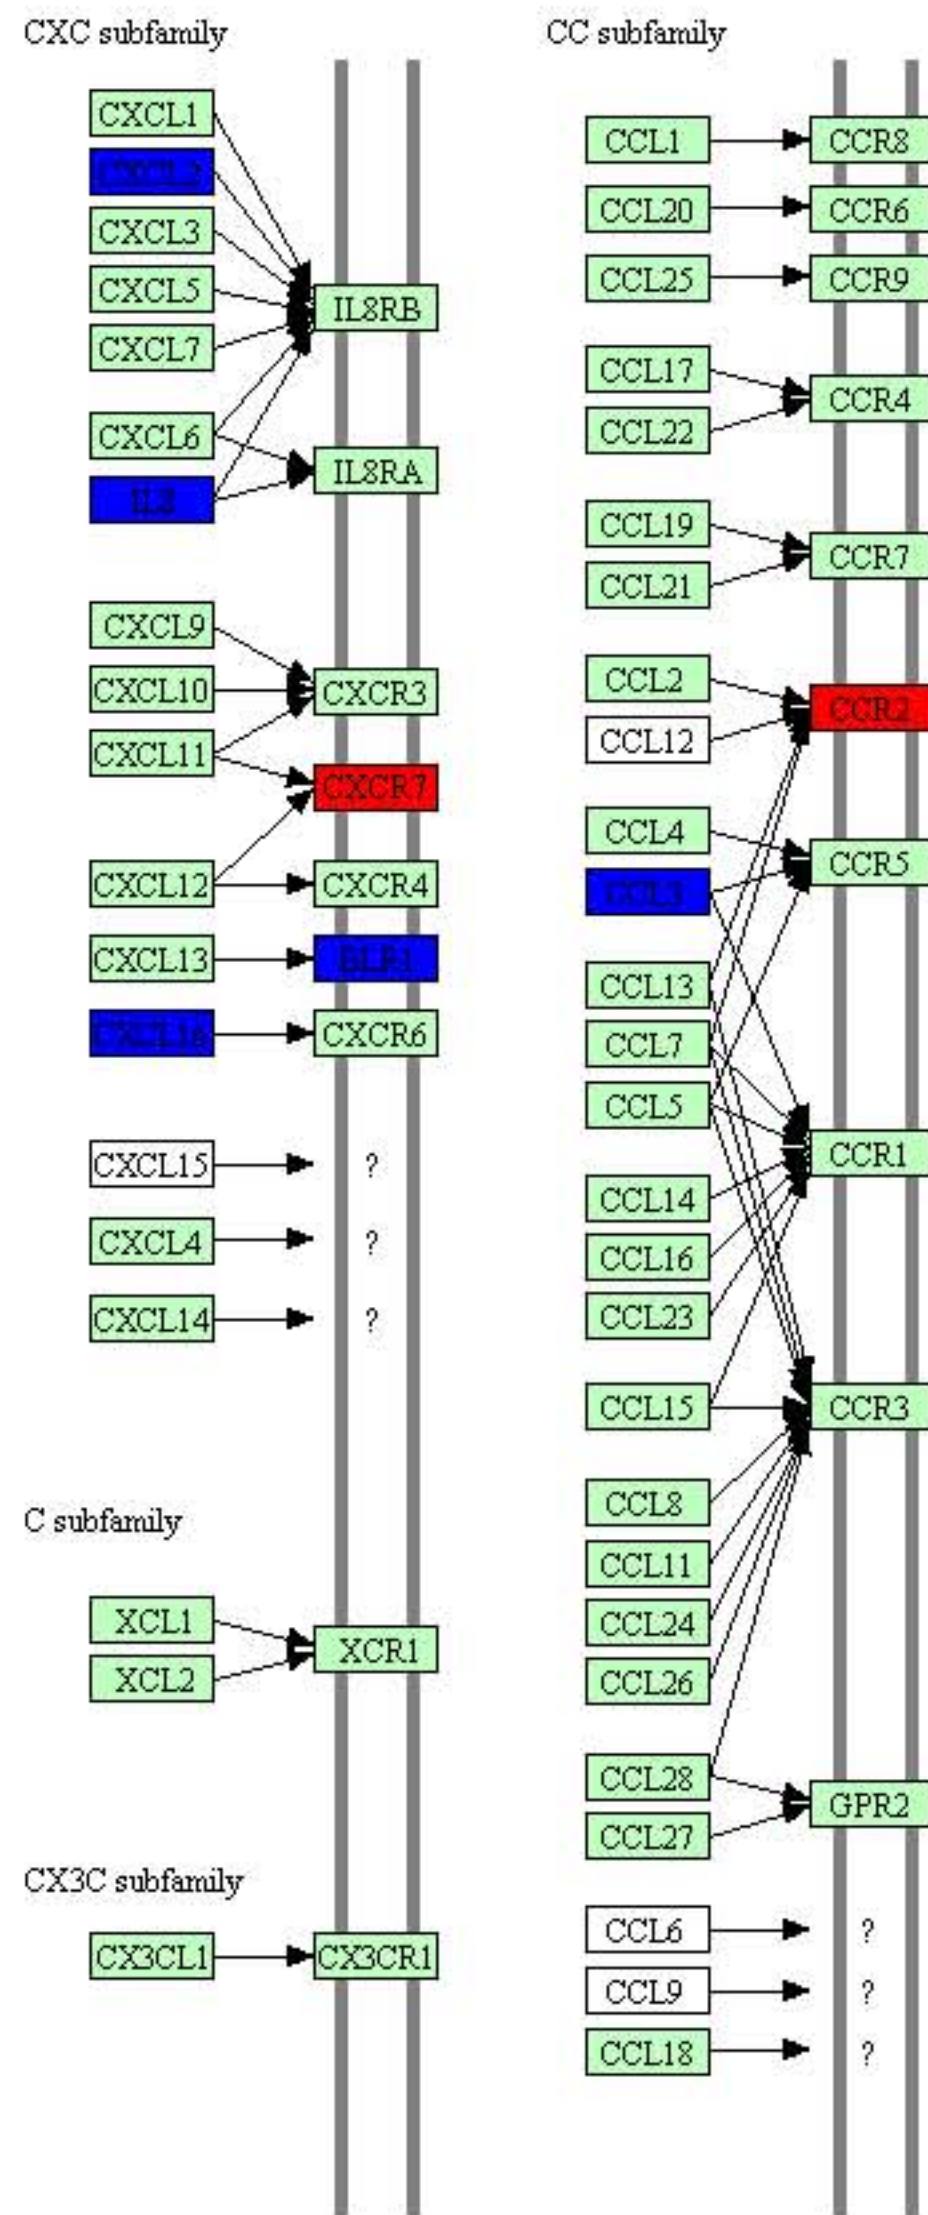

Hematopoietins

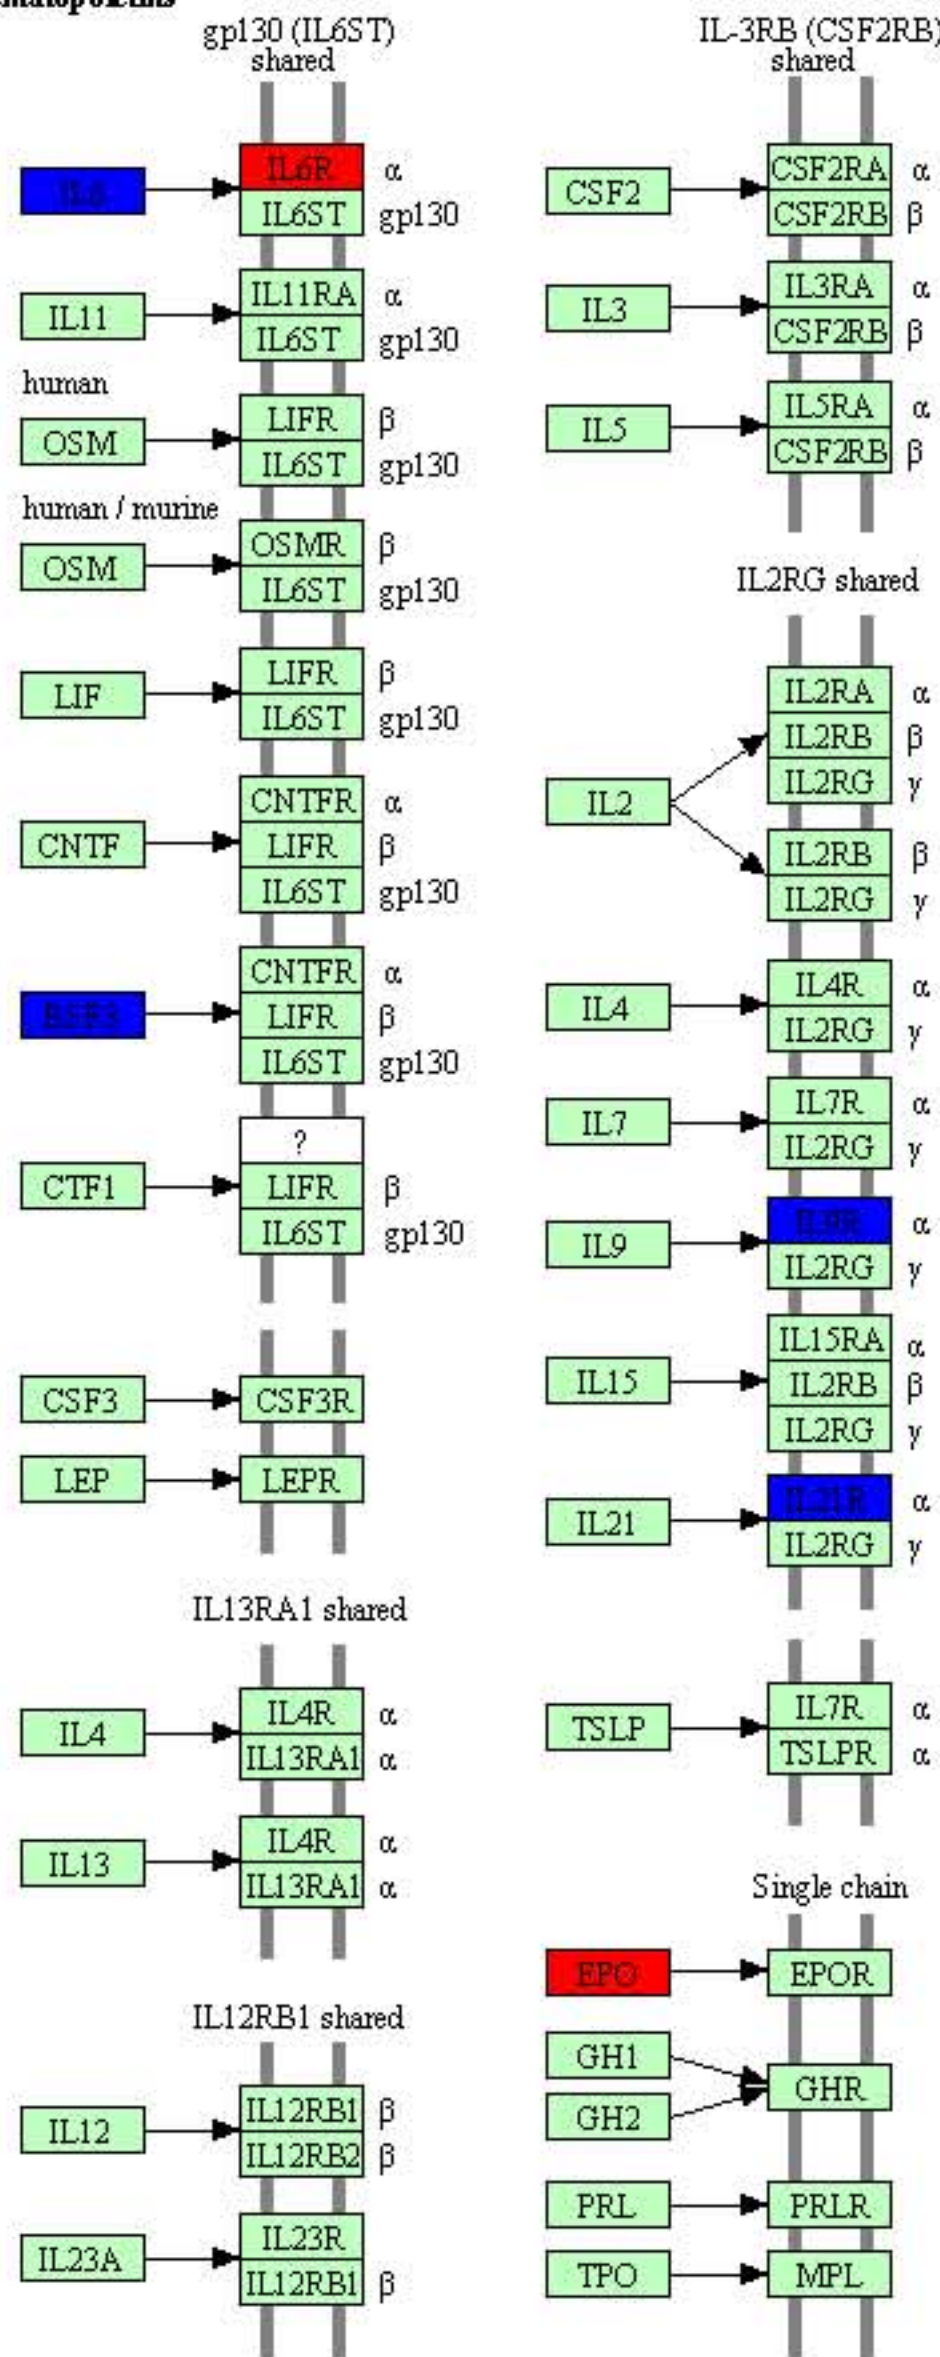

PDGF Family

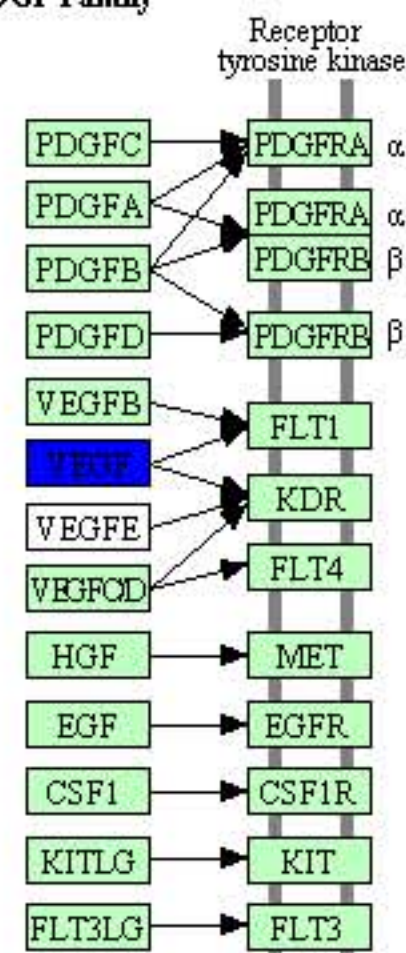

Interferon family

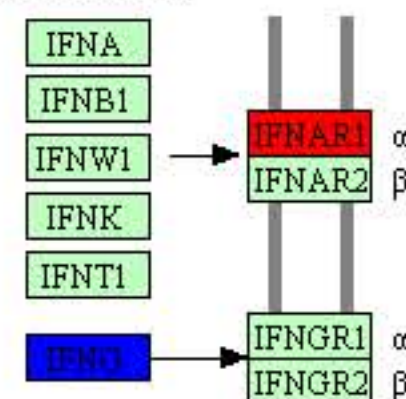

IL-10 family

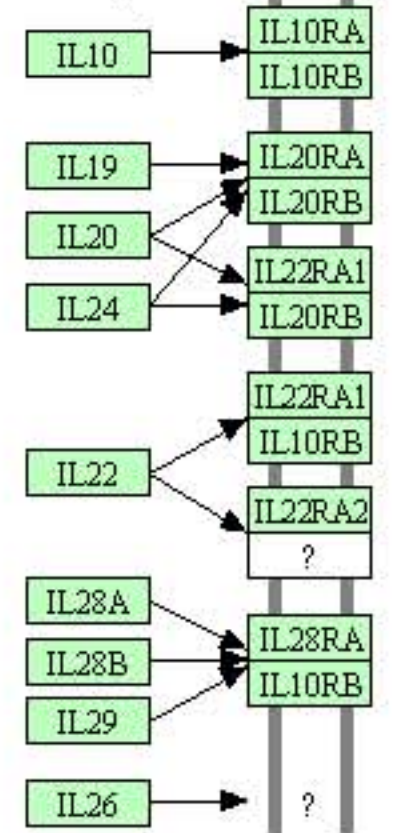

TNF Family

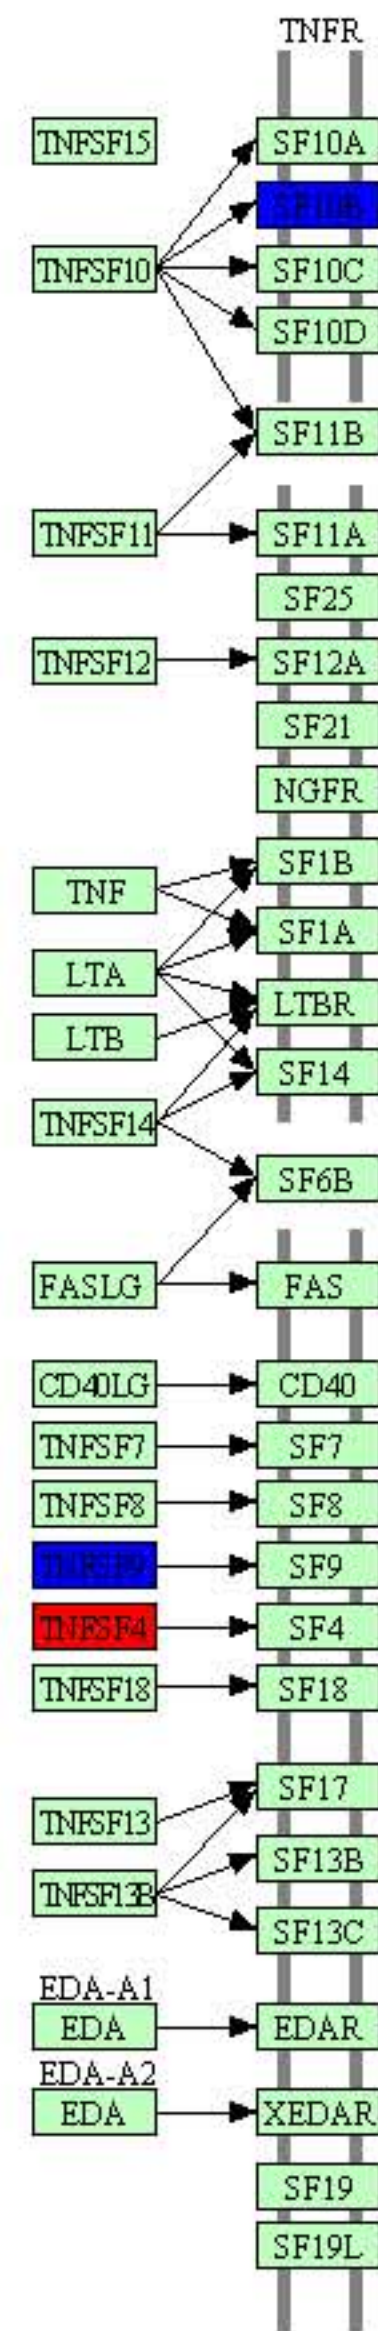

TGF-β family

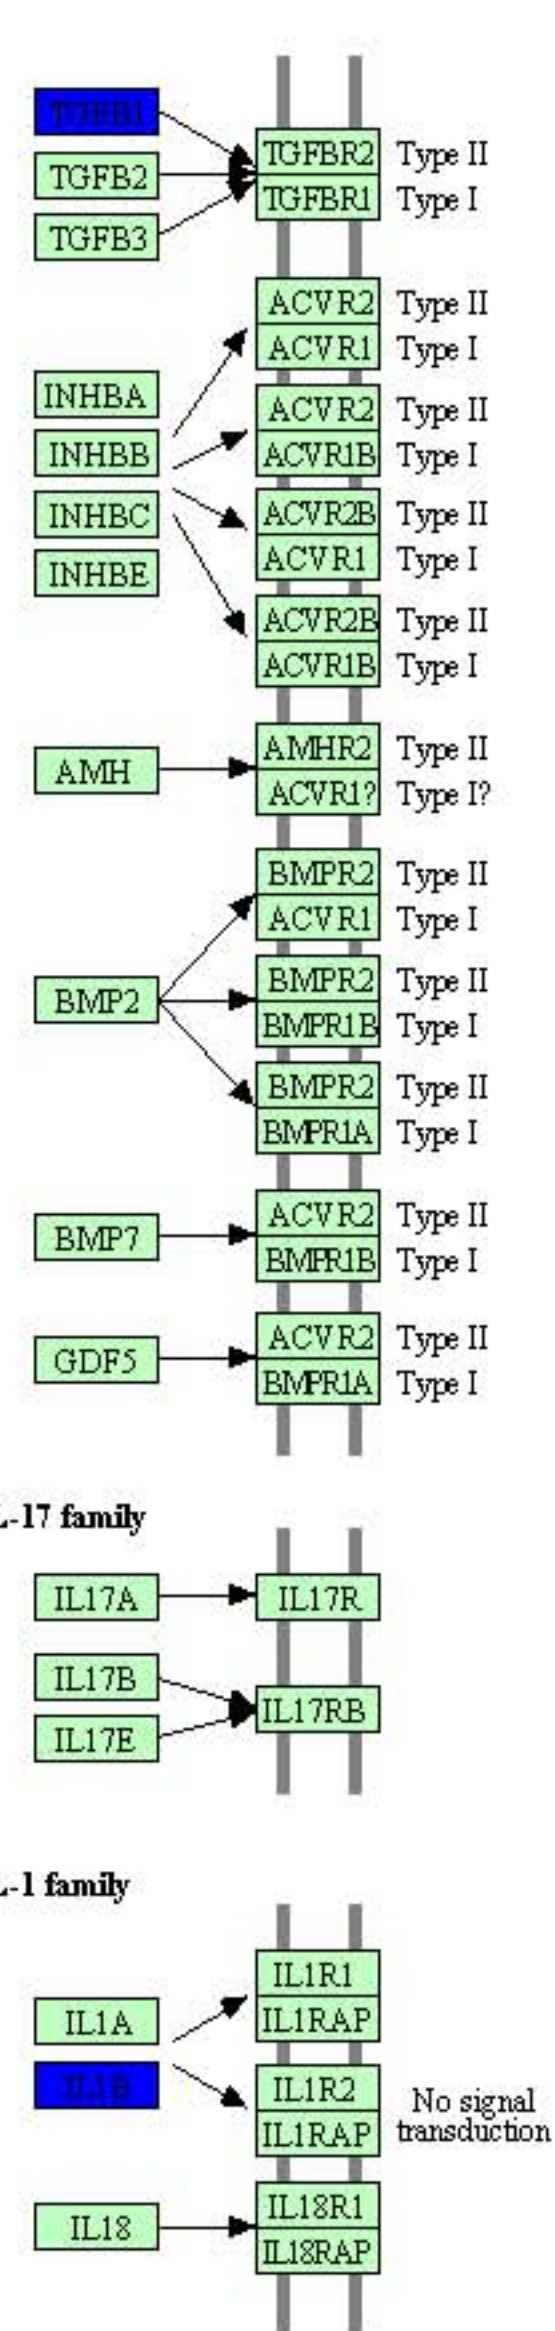

Supplement: supp_85_6_3015__1.pdf [file supp_85_6_3015__1.pdf]
